# Supplementary material for: Optical properties of SiO2@M (M = Au, Pd, Pt) core–shell nanoparticles: material dependence and damping mechanisms
Source: Royal Society of Chemistry journal article supplement (doi:10.1039/c4tc02780a), 2014-12-30
Supplement: c4tc02780a1.pdf [file c4tc02780a1.pdf]

Supplementary material (ESI) for *J. Mater. Chem. C*

Supporting information for:

## Optical Properties of SiO<sub>2</sub>@M (M=Au, Pd, Pt) Core-shell Nanoparticles: Material Dependence, and Damping Mechanisms

Xuemin Zhang,<sup>\*a</sup> Shunsheng Ye,<sup>b</sup> Xun Zhang,<sup>c</sup> Lianpeng Wu<sup>c</sup>

<sup>a</sup> *Department of Chemistry, College of Sciences, Northeastern University, Shenyang 110004, P. R. China, E-mail: zhangxuemin@mail.neu.edu.cn.*

<sup>b</sup> *State Key Lab of Supramolecular Structure and Materials, College of Chemistry, Jilin University, Changchun 130012, P. R. China.*

<sup>c</sup> *Jilin Entry-exit Inspection and Quarantine Bureau, Changchun 130062, P. R. China*

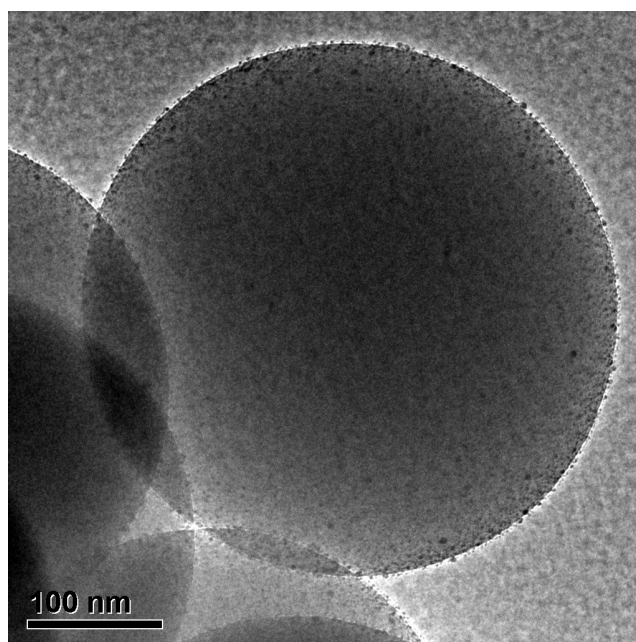

**Figure S1.** TEM image of gold-seeded silica core. It can be roughly estimated that the surface coverage of gold seeds is less than 30%.

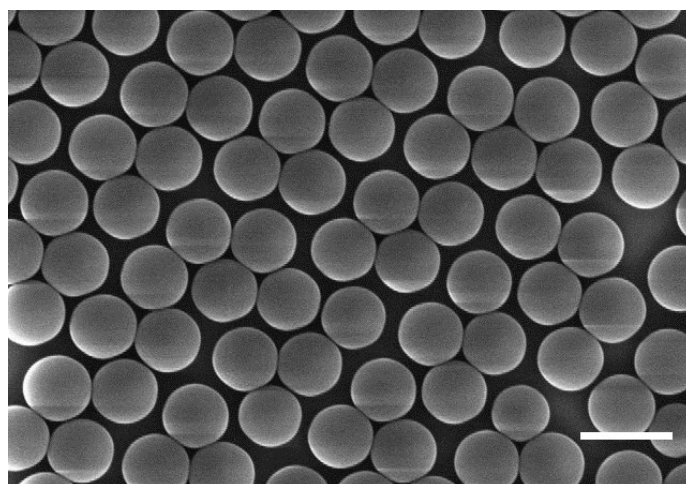

**Figure S2.** SEM image of silica nanospheres prepared by the Stöber method. Different from  $\text{SiO}_2\text{@M}$  core-shell NPs, their surface are clean and smooth. The scale bar represents 200 nm.

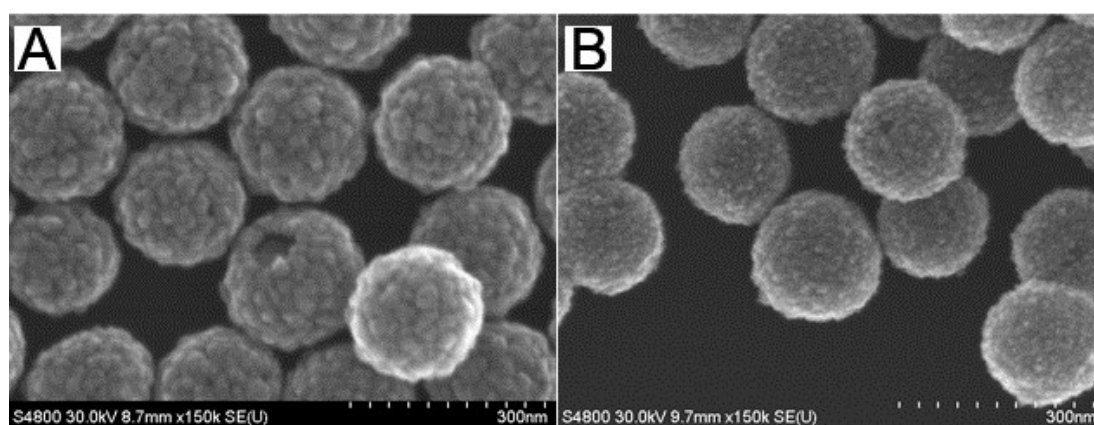

**Figure S3.** Magnified SEM images of  $\text{SiO}_2\text{@Pd}$  (A) and  $\text{SiO}_2\text{@Pt}$  (B) NPs. Both of their shell thicknesses are  $\sim 13\text{nm}$ .

**Table S1. Statistical analysis of the relationship between the dipolar peak position<sup>a</sup>, core size and gold shell thickness.**

| Gold shell thickness (nm) | Diameter of the SiO <sub>2</sub> Core (nm) |     |     |      |      |
|---------------------------|--------------------------------------------|-----|-----|------|------|
|                           | 40                                         | 100 | 160 | 280  | 400  |
| 8                         | 575                                        |     |     |      |      |
| 10                        | 563                                        | 707 | 836 | 1050 | 1256 |
| 15                        | 540                                        | 658 | 755 | 994  | 1218 |
| 20                        | 532 <sup>b</sup>                           | 618 | 720 | 956  | 1189 |
| 25                        | 532                                        | 596 | 696 | 926  | 1179 |
| 30                        | 532                                        | 601 | 689 | 916  | 1187 |
| 35                        | 535                                        | 607 | 700 | 932  | 1210 |
| 40                        | 537                                        | 617 | 735 | 960  | 1250 |

<sup>a</sup> in the ESI, the surrounding environment was set as air in the FDTD calculations.

<sup>b</sup> the peak position (nm) represented using red color indicates the crossover point.

**Table S2. Statistical analysis of the relationship between the dipolar peak position<sup>a</sup>, core size and Pd shell thickness.**

| Pd shell thickness (nm) | Diameter of the SiO <sub>2</sub> Core (nm) |     |     |      |      |
|-------------------------|--------------------------------------------|-----|-----|------|------|
|                         | 40                                         | 100 | 160 | 280  | 400  |
| 5                       | 375                                        |     |     |      |      |
| 10                      | 343                                        | 552 | 748 | 1195 | 1452 |
| 15                      | 325 <sup>b</sup>                           | 496 | 681 | 1044 | 1407 |
| 20                      | 325                                        | 479 | 657 | 1001 | 1357 |
| 25                      | 337                                        | 485 | 659 | 957  | 1329 |
| 30                      | 351                                        | 500 | 674 | 970  | 1338 |
| 35                      | 377                                        | 532 | 703 | 995  | 1348 |
| 40                      |                                            | 560 | 733 | 1036 | 1367 |

<sup>a</sup> in the ESI, the surrounding environment was set as air in the FDTD calculations.

<sup>b</sup> the peak position (nm) represented using red color indicates the crossover point.

**Table S3. Statistical analysis of the relationship between the dipolar peak position<sup>a</sup>, core size and Pt shell thickness.**

| Pt shell thickness (nm) | Diameter of the SiO <sub>2</sub> Core (nm) |     |     |      |      |
|-------------------------|--------------------------------------------|-----|-----|------|------|
|                         | 40                                         | 100 | 160 | 280  | 400  |
| 5                       | 388                                        |     |     |      |      |
| 10                      | 353                                        | 559 | 726 | 1068 | 1436 |
| 15                      | 333 <sup>b</sup>                           | 505 | 665 | 994  | 1386 |
| 20                      | 333                                        | 486 | 644 | 970  | 1338 |
| 25                      | 342                                        | 489 | 650 | 972  | 1328 |
| 30                      | 355                                        | 499 | 663 | 983  | 1328 |
| 35                      | 374                                        | 538 | 700 | 1003 | 1347 |
| 40                      |                                            | 562 | 738 | 1045 | 1357 |

<sup>a</sup> in the ESI, the surrounding environment was set as air in the FDTD calculations.

<sup>b</sup> the peak position (nm) represented using red color indicates the crossover point.

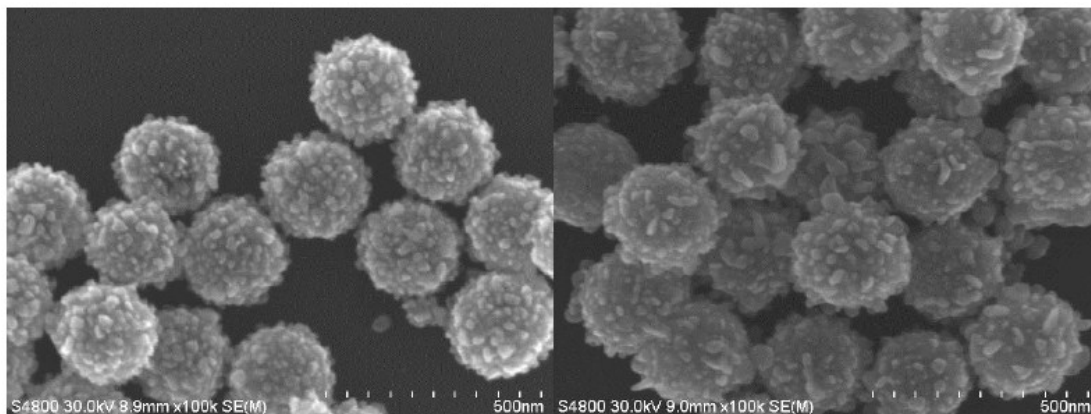

**Figure S4.** SiO<sub>2</sub>@Au core-shell NPs with rough surfaces. The shell thickness are roughly 36 nm and 42 nm, respectively. Their corresponding extinction spectra are given in Figure 3B.

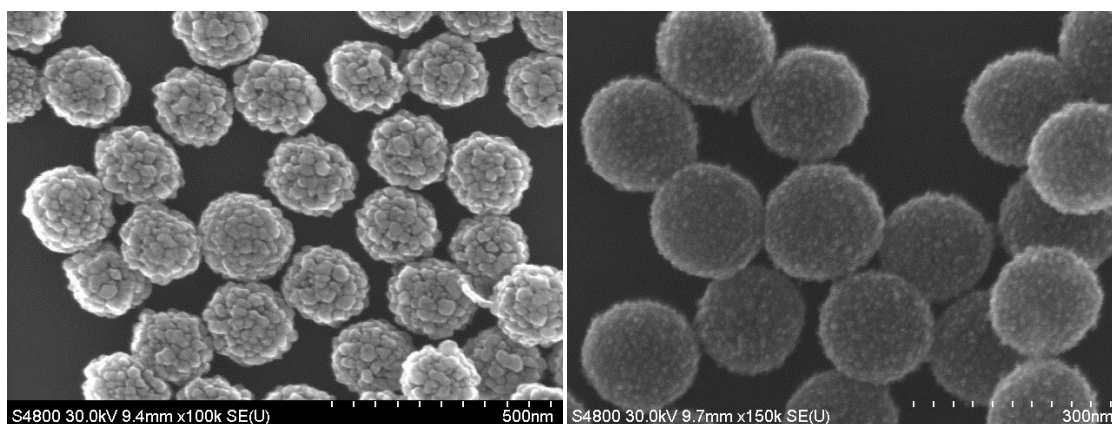

**Figure S5.** Pd (left) and Pt (right) nanoparticle decorated silica core.

The polarizability  $\alpha$  of a metallic nanoshell can be represented using following equation:

$$\alpha = 4\pi a_2^3 \frac{(\epsilon_2 - \epsilon_m)(\epsilon_1 + 2\epsilon_2) + f(\epsilon_1 - \epsilon_2)(\epsilon_m + 2\epsilon_2)}{(\epsilon_2 + 2\epsilon_m)(\epsilon_1 + 2\epsilon_m) + f(2\epsilon_2 - 2\epsilon_m)(\epsilon_1 - \epsilon_2)}$$

(S1)

where  $a_1$  is the inner radius,  $a_2$  is the outer radius,  $f = a_1^3/a_2^3$  being the fraction of the total particle volume occupied by the inner sphere;  $\epsilon_1$ ,  $\epsilon_m$  and  $\epsilon_2$  are the dielectric constants of the core, shell and surrounding environment, respectively. From equation S1, it can be concluded that  $\alpha$  will reach its maximum at the condition that the denominator equals 0. Because  $\epsilon_1$ ,  $\epsilon_2$ ,  $f$  are all real numbers and  $\epsilon_m$  is a complex number, the presence of large imaginary part  $\epsilon_i$  in the  $\epsilon_m$  will greatly reduce the magnitude of  $\alpha$ . For Pt and Pd, they exhibit a higher value of  $\epsilon_i$  compared to Au (in the present spectral range, approximately 10 times larger). As a result, the polarizability  $\alpha$  of a Pd and Pt nanoshells is much lower than that of Au nanoshells. In the meanwhile, it is also noted that  $\alpha$  has a functional dependence on  $a_2^3$ , therefore, the crossover thickness generally increases with the increase of core sizes.
